# Supplementary material for: Copper sulfide-incorporated layered porous sulfur-doped graphitic carbon nitride nanosheets for an efficient catalytic reduction of 4-nitrophenol
Source: Royal Society of Chemistry journal article supplement (doi:10.1039/d4nj02069c), 2024-01-01
Supplement: d4nj02069c1.pdf [file d4nj02069c1.pdf]

## Supplementary Information

# Copper Sulfide-Incorporated Layered Porous Sulfur-Doped Graphitic Carbon Nitride Nanosheets for an Efficient Catalytic Reduction of 4-Nitrophenol

**Mallappa Mahanthappa<sup>1‡</sup>, Subramaniyan Ramasundaram<sup>2‡</sup>, K. Upendranath<sup>3</sup>,  
Mohd Fahad<sup>4</sup>, Lavanya Gunamalai<sup>5</sup>, Osamah Alduhaish<sup>6</sup>, Mani D<sup>7</sup>, Tae Hwan Oh<sup>2†</sup>,  
Vishwanath R S<sup>3†</sup>**

<sup>1</sup>Department of Chemistry, School of Applied Sciences, REVA University, Bengaluru - 5600 64, India.

<sup>2</sup>School of Chemical Engineering, Yeungnam University, Gyeongsan 38436, Republic of Korea.

<sup>3</sup>Centre for Research in Functional Materials (CRFM), JAIN (Deemed-to-be University), Jain Global Campus, Bengaluru 562112, Karnataka, India.

<sup>4</sup>Functional Ceramics Laboratory, Indian Institute of Technology (Indian School of Mines), Dhanbad 826004, Jharkhand, India.

<sup>5</sup>Institute of Molecular Medicine, University of Texas Health Science Centre, Houston, Texas-77030, USA.

<sup>6</sup>Department of Chemistry, College of Science, King Saud University, Riyadh 11451, Saudi Arabia.

<sup>7</sup>Saveetha School of Engineering, Saveetha Institute of Medical and Technical Sciences (SIMATS), Chennai- 602105, Tamil Nadu, India.

‡ Authors contributed equally

† **Corresponding authors:**

Dr. Vishwanath R S, E-mail: rs.vishwanath234@gmail.com

Dr. Tae Hwan Oh, E-mail: taehwanoh@ynu.ac.kr

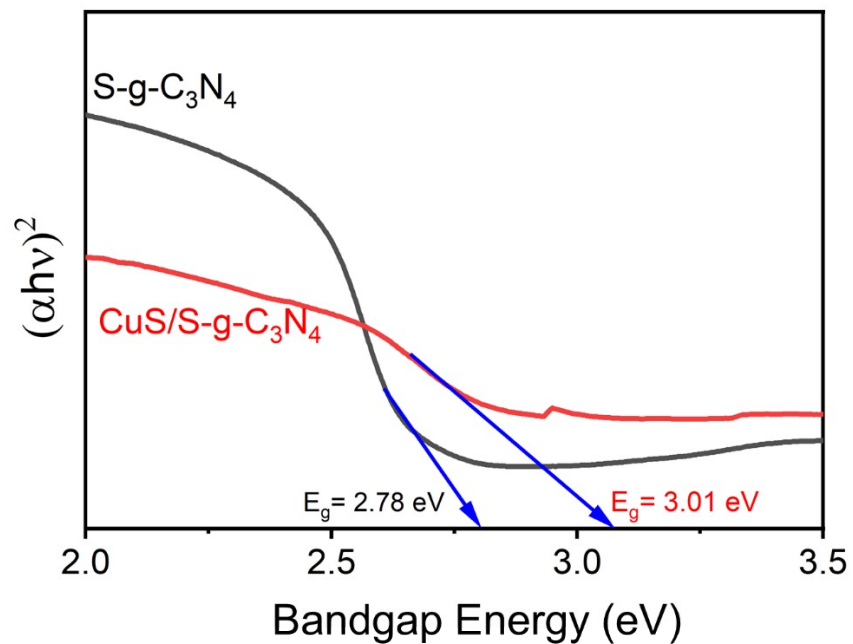

**Figure S1.** Tauc's plot of  $(\alpha h\nu)^2$  vs. Band gap energy of  $s\text{-}g\text{-C}_3\text{N}_4$  (Black line) and  $\text{CuS}/s\text{-}g\text{-C}_3\text{N}_4$  (Red line) samples.

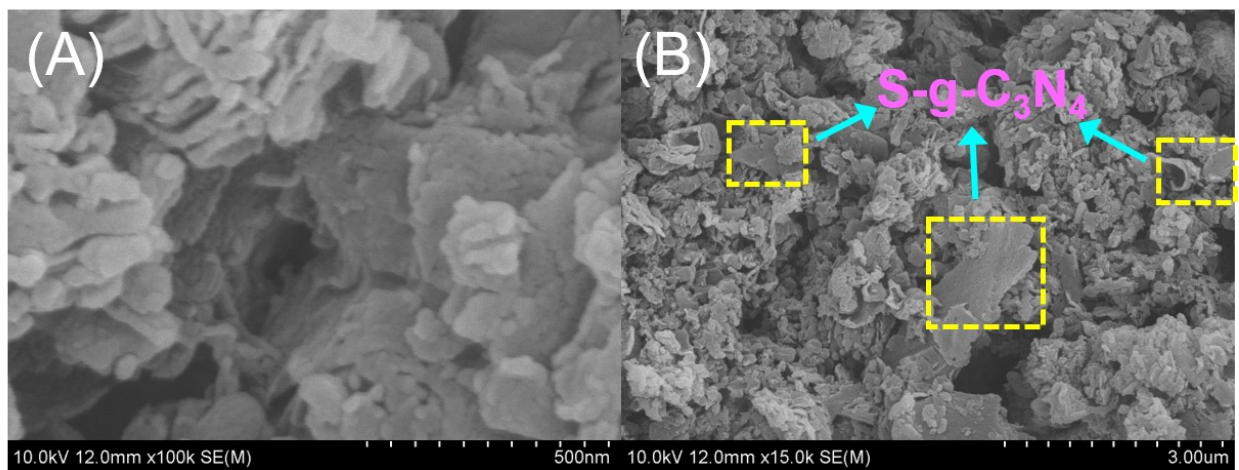

**Figure S2.** SEM micrographs of **(A)** s-g-C<sub>3</sub>N<sub>4</sub> and **(B)** CuS/s-g-C<sub>3</sub>N<sub>4</sub> samples.

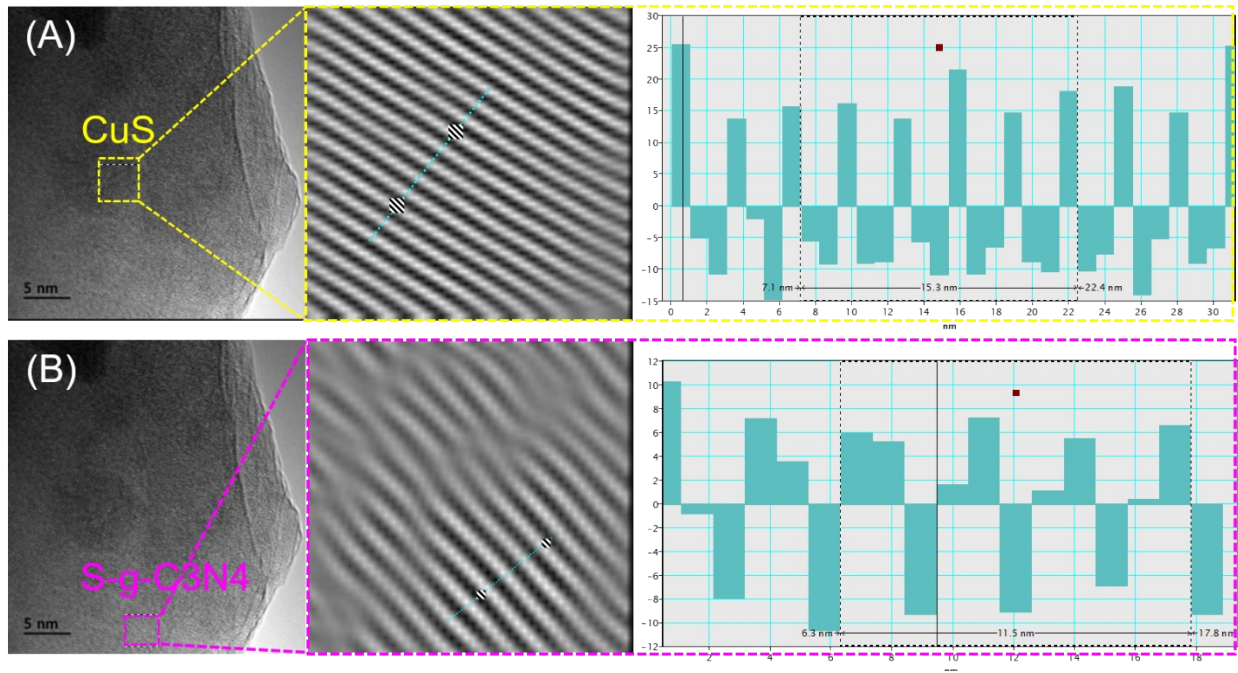

**Figure S3.** HR-TEM image of the CuS/ S-g-C<sub>3</sub>N<sub>4</sub> composite used for the determination of d-spacing CuS **(A)** and s-g-C<sub>3</sub>N<sub>4</sub> **(B)**.

**Table S1.** The catalytic reduction of various nitro scaffolds using CuS/s-g-C<sub>3</sub>N<sub>4</sub>.

| SI No | Substrate                                                                           | Abbreviations          | Reduction rate (%) | Time (min) |
|-------|-------------------------------------------------------------------------------------|------------------------|--------------------|------------|
| 1     | 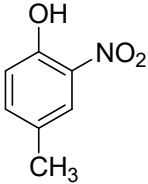   | 4-methyl-2-nitrophenol | 99.3               | 3          |
| 2     |    | 2-nitroamine           | 98.7               | 6          |
| 3     |    | 2-nitrophenol          | 99.3               | 2          |
| 4     |   | 3-nitroamine           | 99.5               | 3          |
| 5     |  | 2,4-Dinitroamine       | 89.3               | 3          |
| 6     |  | 4-nitrodiamine         | 98.6               | 2          |
| 7     |  | 4-nitroamine           | 98.8               | 6          |

**Table S2.** Comparison of the apparent rate constant of 4-NP reduction with various catalysts using the Langmuir-Hinshelwood equation.

| <b>Catalysts</b>                                                 | <b>4-NP</b>                                               | <b>NaBH<sub>4</sub></b> | <b>k<br/>(min<sup>-1</sup>)</b> | <b>Time<br/>(min)</b> | <b>References</b>   |
|------------------------------------------------------------------|-----------------------------------------------------------|-------------------------|---------------------------------|-----------------------|---------------------|
| PANI/ZnO/MnO <sub>2</sub>                                        | 0.2 mM                                                    | 0.1 M                   | 219                             | 10                    | 1                   |
| CuO nanoparticles                                                | 0.36                                                      | 30                      | 0.022                           | 15                    | 2                   |
| GO/Au                                                            | 0.1 mM                                                    | 0.1 M                   | -                               | 2100                  | 3                   |
| TiO <sub>2</sub> /rGO NCs                                        | 10 mg/L of 4-NP<br>+ H <sub>2</sub> O <sub>2</sub> (1 Mm) | -                       | 0.0216                          | 32                    | 4                   |
| PANI Nanofibers                                                  | 0.2 mM                                                    | 0.002 M                 | 48.8                            | 40                    | 5                   |
| Ca <sup>2+</sup> -doped AgInS <sub>2</sub>                       | 15 mg/L                                                   | -                       | -                               | 120                   | 6                   |
| Ag <sub>3</sub> PO <sub>4</sub> /g-C <sub>3</sub> N <sub>4</sub> | 30 mg/L                                                   | 20mM                    | 0.01277                         | 5                     | 7                   |
| ZnO/Ag <sub>2</sub> O                                            | 1.0 mM                                                    | 0.01 M                  | 229.65                          | 21                    | 8                   |
| Bi <sub>2</sub> O <sub>3</sub>                                   | 0.5 mM                                                    | 0.2 M                   | 91.42                           | 50                    | 9                   |
| <b>CuS/s-g-C<sub>3</sub>N<sub>4</sub></b>                        | <b>20 mg L<sup>-1</sup></b>                               | <b>0.1 M</b>            | <b>2.357</b>                    | <b>3</b>              | <b>Present work</b> |

## References

1. P. L. Meena, L. K. Chhachhia and A. K. Surela, *Journal of Molecular Structure*, 2024, **1303**, 137575.
2. A. Bhattacharjee and M. Ahmaruzzaman, *Materials Letters*, 2015, **161**, 79-82.
3. P. Fakhri, M. Nasrollahzadeh and B. Jaleh, *RSC Advances*, 2014, **4**, 48691-48697.
4. A. B. Migdadi, Q. M. Al-Bataineh, A. A. Ahmad, H. M. Al-Khateeb and A. Telfah, *Journal of Alloys and Compounds*, 2024, **971**, 172794.
5. P. Lal Meena, J. Kumar Saini and A. Kumar Surela, *Inorganic Chemistry Communications*, 2023, **152**, 110688.
6. K. Qi, X. Wang, S. Liu, S. Lin, Y. Ma and Y. Yan, *Molecules*, 2024, **29**, 361.
7. N. A. Chopan, A. H. Bhat and H.-T.-N. Chishti, *New Journal of Chemistry*, 2023, **47**, 15922-15941.
8. P. L. Meena, K. Poswal, A. K. Surela, K. S. Meena and B. Mordhiya, *Environmental Science and Pollution Research*, 2023, **30**, 68770-68791.
9. P. L. Meena, A. K. Surela, J. K. Saini and L. K. Chhachhia, *Environmental Science and Pollution Research*, 2022, **29**, 79253-79271.
